# Supplementary material for: Polymerization of 1,3-Butadiene with Catalysts Based on Cobalt Dichloride Complexes with Aminophosphines: Switching the Regioselectivity by Varying the MAO/Co Molar Ratio
Source: Springer Nature journal article supplement (doi:10.1007/s10118-023-3060-x), 2023-11-10
Supplement: 10118_2023_3060_MOESM1_ESM.pdf [file 10118_2023_3060_MOESM1_ESM.pdf]

## Electronic Supplementary Information

# Polymerization of 1,3-Butadiene with Catalysts Based on Cobalt Dichloride Complexes with Aminophosphines: Switching the Regioselectivity by Varying the MAO/Co Molar Ratio

Giovanni Ricci<sup>a\*</sup>, Anna Sommazzi<sup>b</sup>, Francesco Masi<sup>c</sup>, and Alessandra Forni<sup>d</sup>

<sup>a</sup> CNR-Istituto di Scienze e Tecnologie Molecolari "Giulio Natta" (SCITEC), via A. Corti 12, 20133 Milano, Italy

<sup>b</sup> Scientific Advisor, Viale Giovanni XXII 34, I- 28100 Novara (NO), Italy

<sup>c</sup> Scientific Advisor, Via Galvani 7, I- 26866 Sant'Angelo Lodigiano (LO), Italy.

<sup>d</sup> CNR-Istituto di Scienze e Tecnologie Molecolari "Giulio Natta" (SCITEC), via C. Golgi 19, 20133 Milano, Italy

---

\* Corresponding author: E-mail [giovanni.ricci@scitec.cnr.it](mailto:giovanni.ricci@scitec.cnr.it)

***FT-IR Spectra of the cobalt complexes***

Figure S1. IR spectrum (solid state) of **CoL1**

Figure S2. IR spectrum (solid state) of **CoL2**

Figure S3. IR spectrum (solid state) of **CoL3**

Figure S4. IR spectrum (solid state) of **CoL4**

Figure S5. IR spectrum (solid state) of **CoL5**

Figure S6. IR spectrum (solid state) of **CoL6**

Figure S7. IR spectrum (solid state) of **CoL7**

***FT-IR Spectra of the polymers***

Figure S8. FTIR spectrum of entry **1** (ref. Table 3 of the manuscript).

Figure S9. FTIR spectrum of entry **2** (ref. Table 3 of the manuscript).

Figure S10. FTIR spectrum of entry **3** (ref. Table 3 of the manuscript).

Figure S11. FTIR spectrum of entry **4** (ref. Table 3 of the manuscript).

Figure S12. FTIR spectrum of entry **5** (ref. Table 3 of the manuscript).

Figure S13. FTIR spectrum of entry **6** (ref. Table 3 of the manuscript).

Figure S14. FTIR spectrum of entry **7** (ref. Table 3 of the manuscript).

Figure S15. FTIR spectrum of entry **8** (ref. Table 3 of the manuscript).

Figure S16. FTIR spectrum of entry **9** (ref. Table 3 of the manuscript).

Figure S17. FTIR spectrum of entry **10** (ref. Table 3 of the manuscript).

Figure S18. FTIR spectrum of entry **11** (ref. Table 3 of the manuscript).

Figure S19. FTIR spectrum of entry **12** (ref. Table 3 of the manuscript).

Figure S20. FTIR spectrum of entry **13** (ref. Table 3 of the manuscript).

Figure S21. FTIR spectrum of entry **14** (ref. Table 3 of the manuscript).

Figure S22. FTIR spectrum of entry **15** (ref. Table 3 of the manuscript).

Figure S23. FTIR spectrum of entry **16** (ref. Table 3 of the manuscript).

Figure S24. FTIR spectrum of entry **17** (ref. Table 3 of the manuscript).

***<sup>1</sup>H and <sup>13</sup>C NMR spectra of the polymers.***

Figure S25. <sup>1</sup>H (bottom) and <sup>13</sup>C NMR (top) spectra of entry **1** (ref. Table 3 of the manuscript).

Figure S26. <sup>1</sup>H (bottom) and <sup>13</sup>C NMR (top) spectra of entry **3** (ref. Table 3 of the manuscript).

Figure S27. <sup>1</sup>H (bottom) and <sup>13</sup>C NMR (top) spectra of entry **9** (ref. Table 3 of the manuscript).

Figure S28. <sup>1</sup>H (bottom) and <sup>13</sup>C NMR (top) spectra of entry **10** (ref. Table 3 of the manuscript).

Figure S29. <sup>1</sup>H (bottom) and <sup>13</sup>C NMR (top) spectra of entry **11** (ref. Table 3 of the manuscript).

Figure S30. <sup>1</sup>H (bottom) and <sup>13</sup>C NMR (top) spectra of entry **12** (ref. Table 3 of the manuscript).

Figure S31. <sup>1</sup>H (bottom) and <sup>13</sup>C NMR (top) spectra of entry **13** (ref. Table 3 of the manuscript).

Figure S32. <sup>1</sup>H (bottom) and <sup>13</sup>C NMR (top) spectra of entry **14** (ref. Table 3 of the manuscript).

Figure S33. <sup>1</sup>H (bottom) and <sup>13</sup>C NMR (top) spectra of entry **15** (ref. Table 3 of the manuscript).

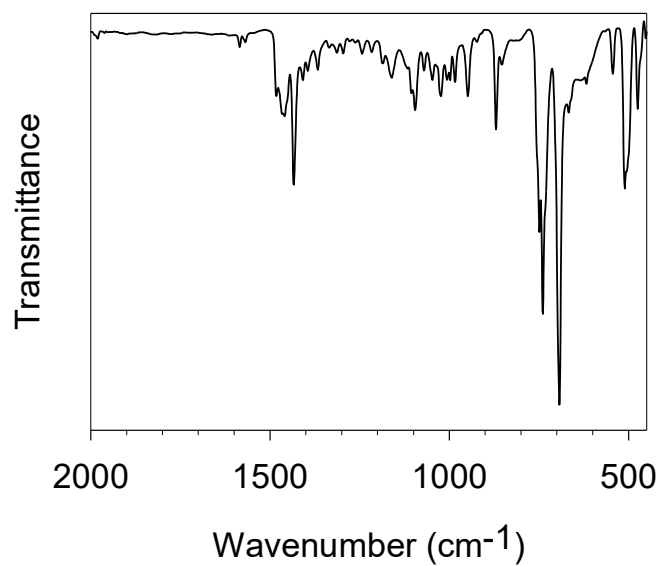

Figure S1. IR spectrum (solid state) of **CoL1**

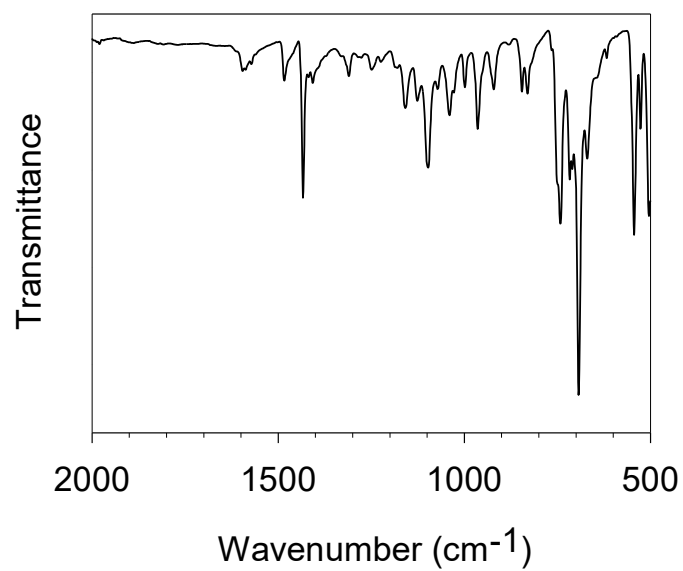

Figure S2. IR spectrum (solid state) of **CoL2**

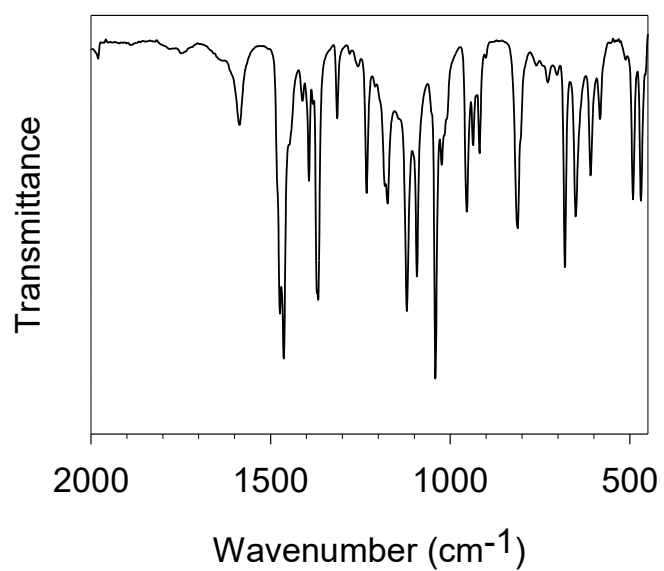

Figure S3. IR spectrum (solid state) of **CoL3**

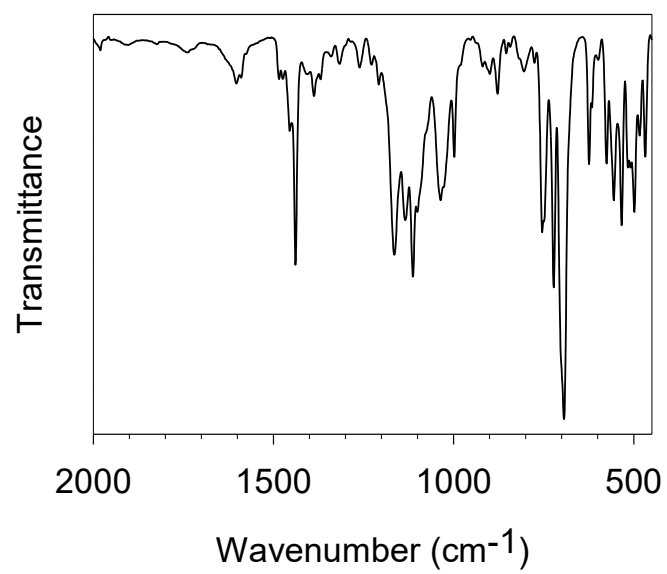

Figure S4. IR spectrum (solid state) of **CoL4**

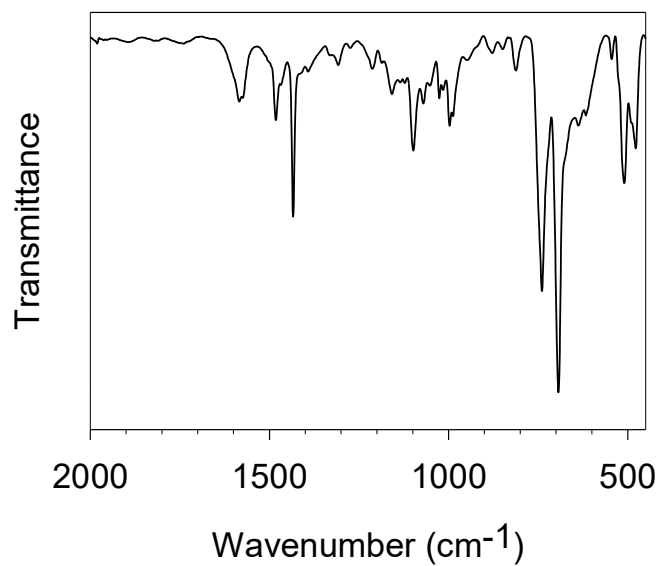

Figure S5. IR spectrum (solid state) of **CoL5**

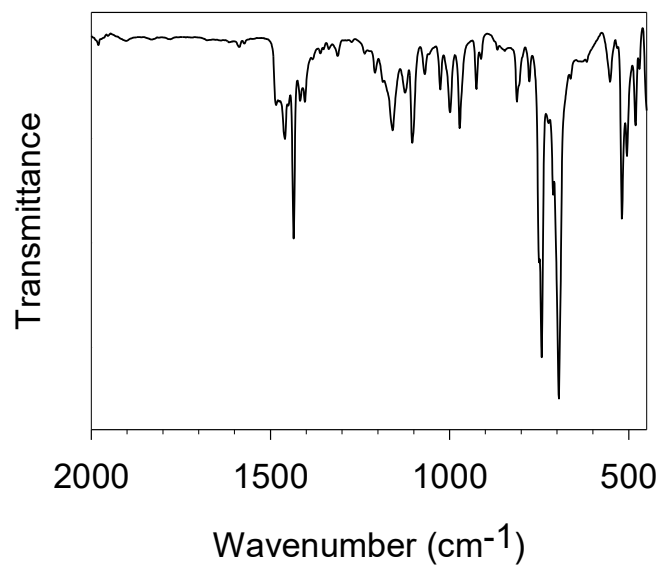

Figure S6. IR spectrum (solid state) of **CoL6**



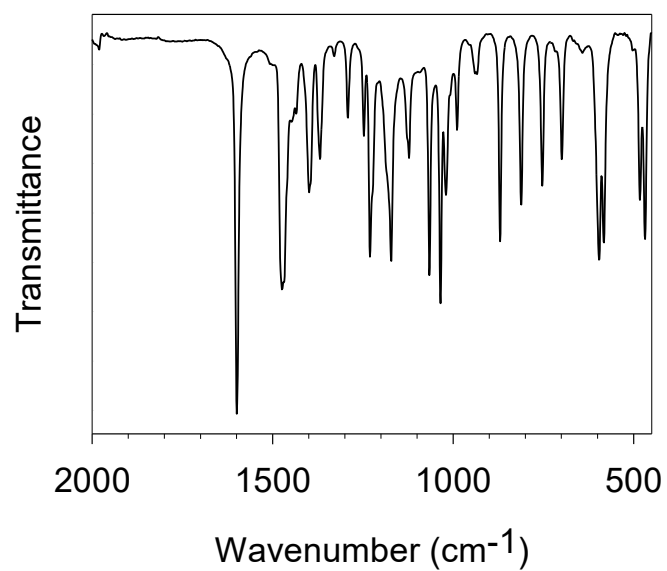

Figure S7. IR spectrum (solid state) of **CoL7**

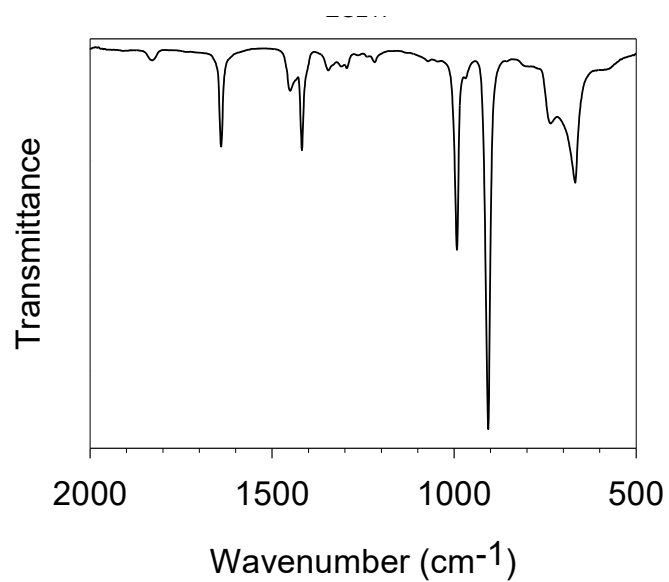

Figure S8. FTIR spectrum of entry **1** (ref. Table 3 of the manuscript).

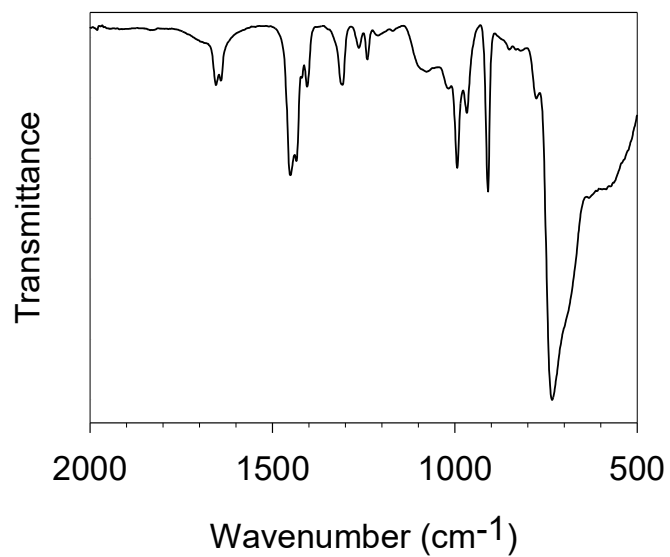

Figure S9. FTIR spectrum of entry 2 (ref. Table 3 of the manuscript).

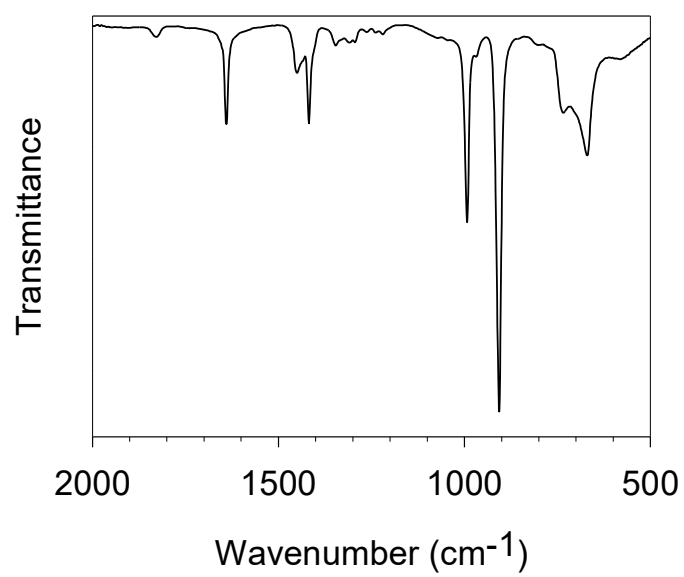

Figure S10. FTIR spectrum of entry 3 (ref. Table 3 of the manuscript).

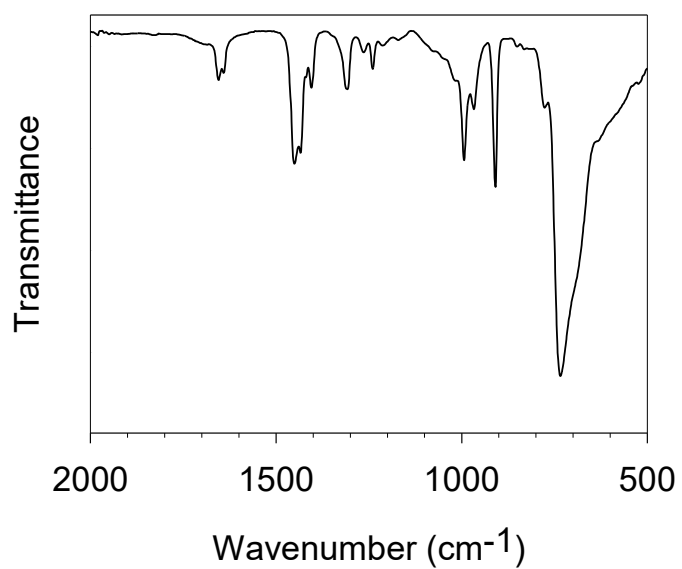

Figure S11. FTIR spectrum of entry 4 (ref. Table 3 of the manuscript).

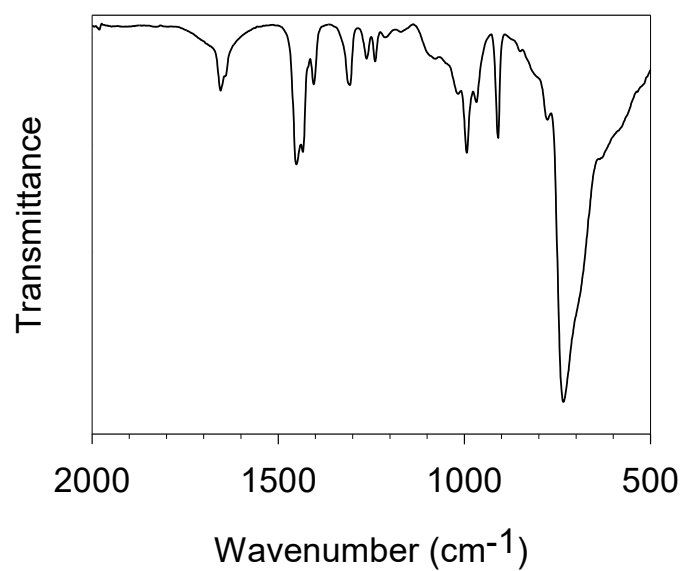

Figure S12. FTIR spectrum of entry **5** (ref. Table 3 of the manuscript).

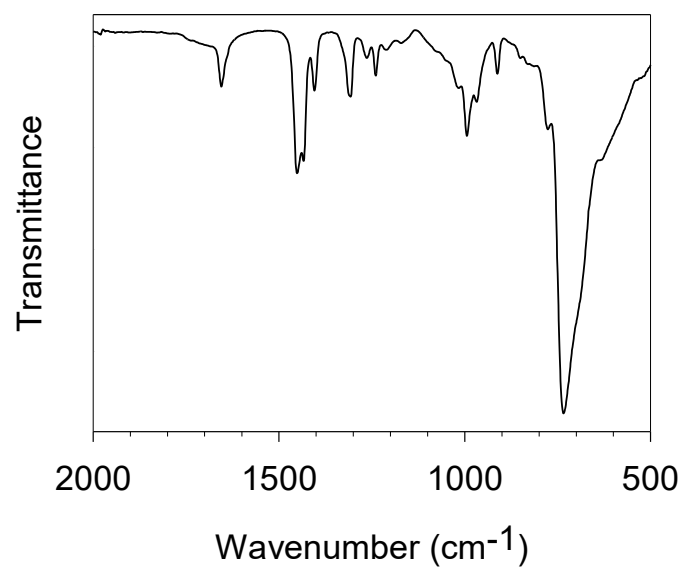

Figure S13. FTIR spectrum of entry 6 (ref. Table 3 of the manuscript).

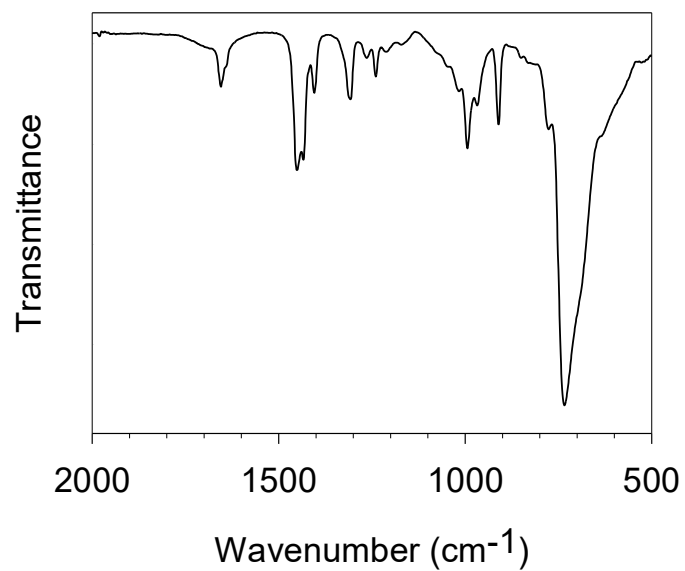

Figure S14. FTIR spectrum of entry 7 (ref. Table 3 of the manuscript).



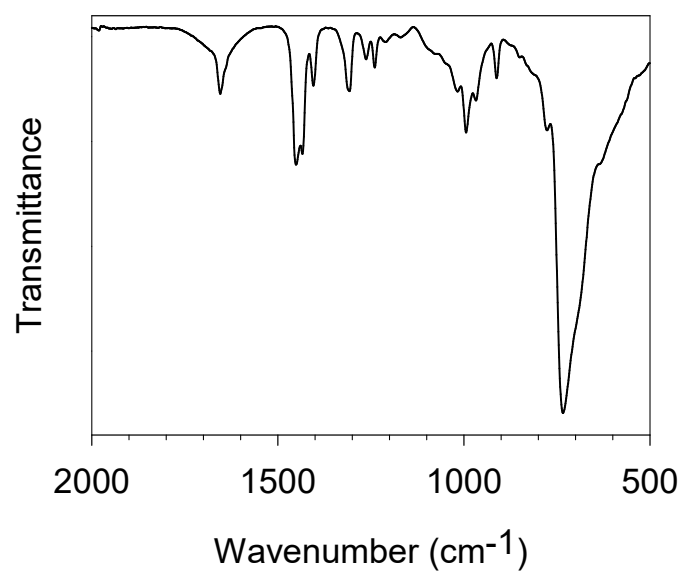

Figure S15. FTIR spectrum of entry 8(ref. Table 3 of the manuscript).

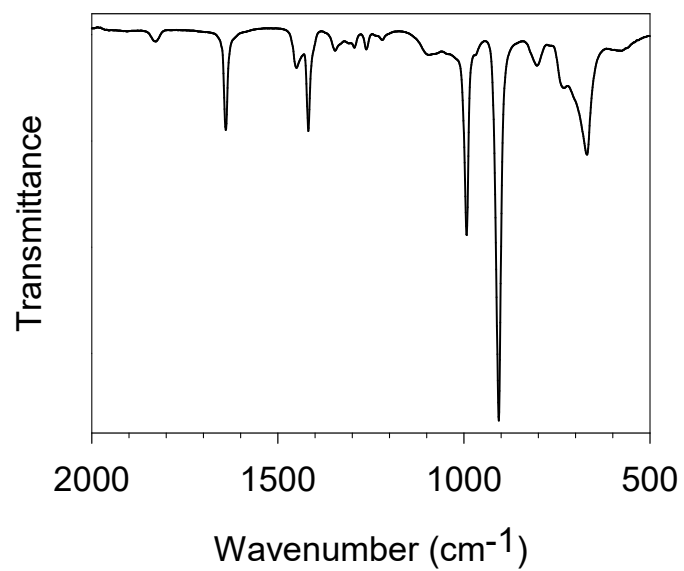

Figure S16. FTIR spectrum of entry 9 (ref. Table 3 of the manuscript).

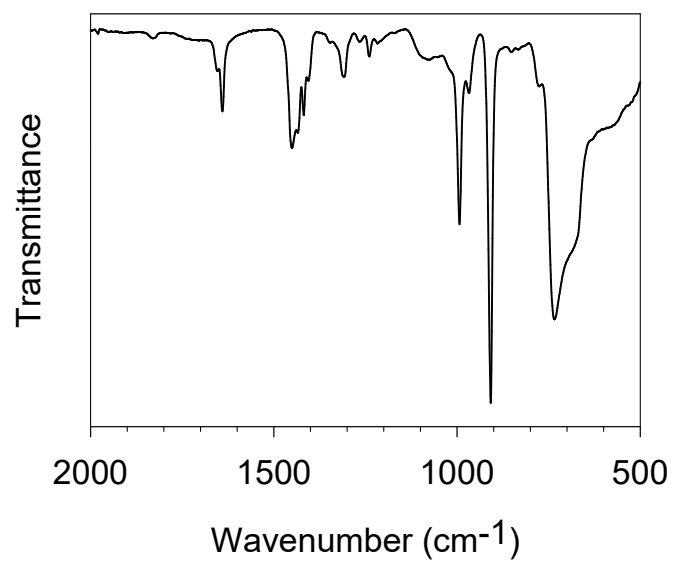

Figure S17. FTIR spectrum of entry **10** (ref. Table 3 of the manuscript).

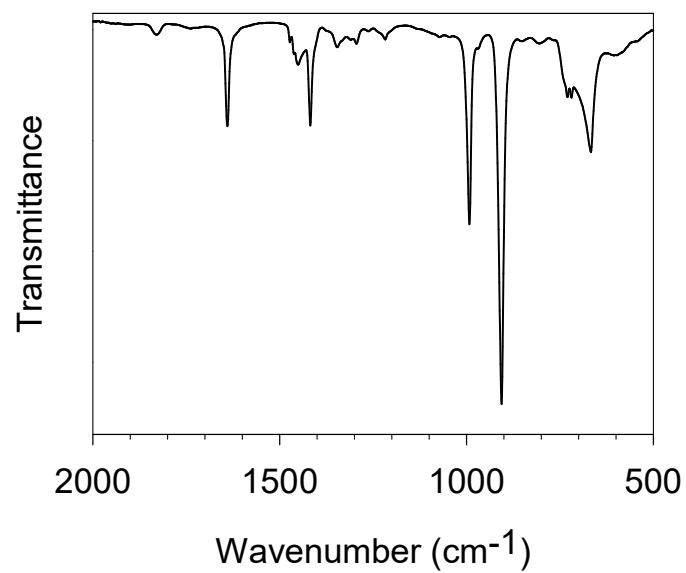

Figure S18. FTIR spectrum of entry **11** (ref. Table 3 of the manuscript).

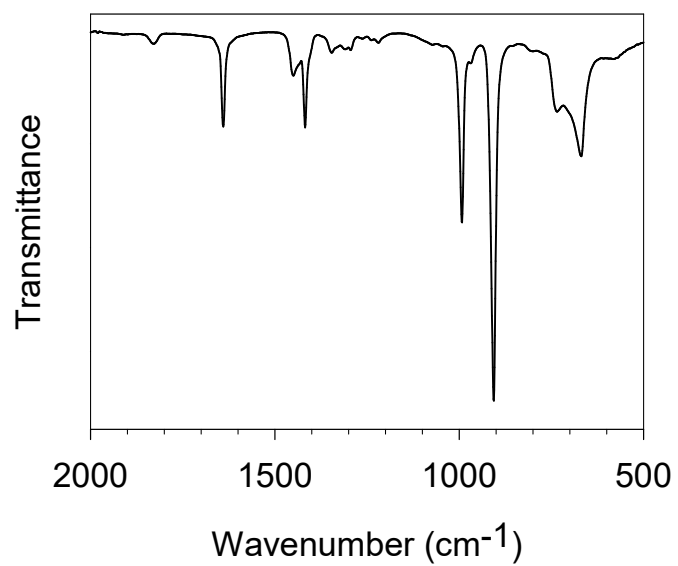

Figure S19. FTIR spectrum of entry **12** (ref. Table 3 of the manuscript).

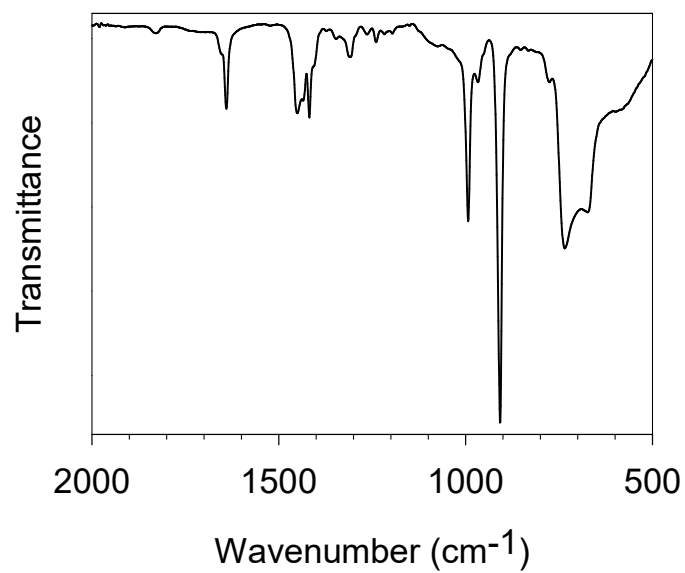

Figure S20. FTIR spectrum of entry **13** (ref. Table 3 of the manuscript).

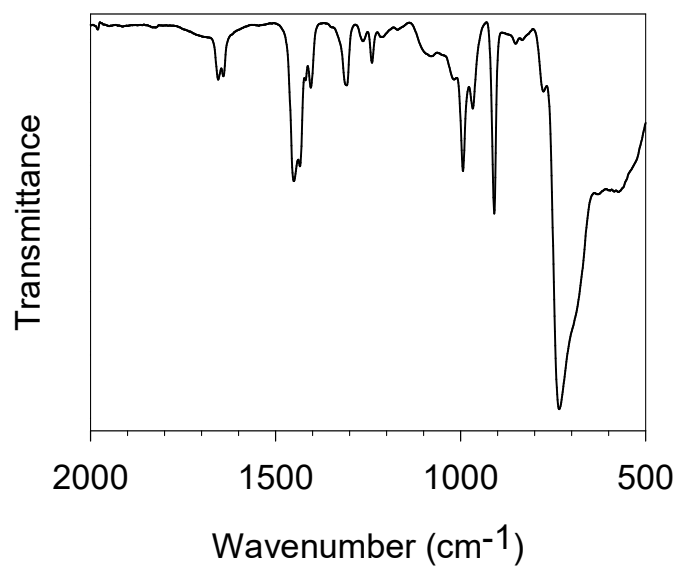

Figure S21. FTIR spectrum of entry **14** (ref. Table 3 of the manuscript).

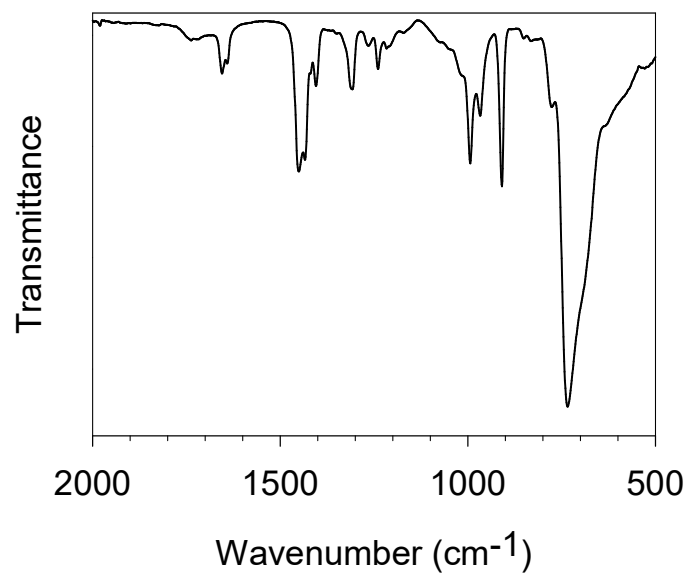

Figure S22. FTIR spectrum of entry **15** (ref. Table 3 of the manuscript).



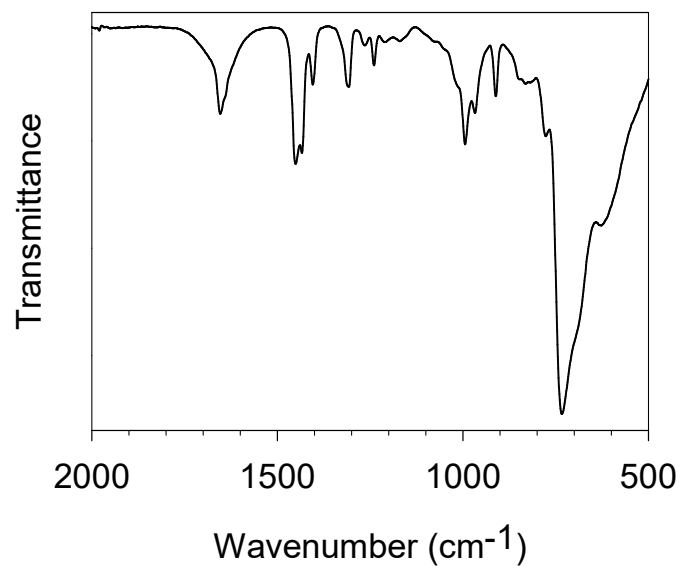

Figure S23. FTIR spectrum of entry **16** (ref. Table 3 of the manuscript).

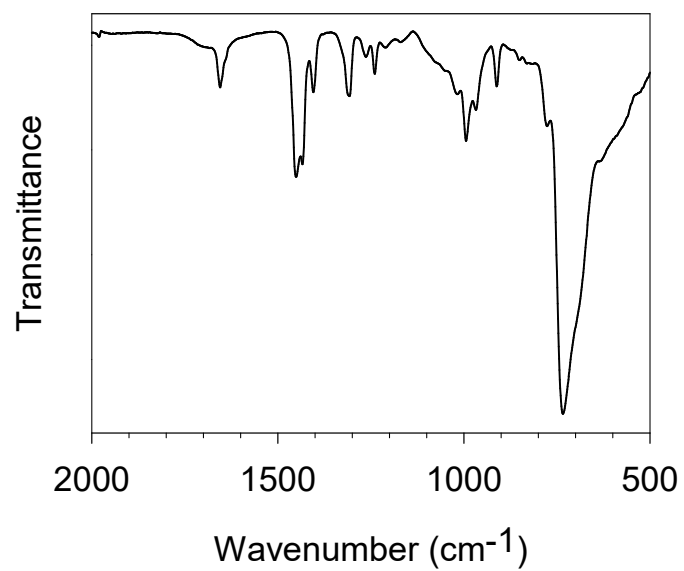

Figure S24. FTIR spectrum of entry 17 (ref. Table 3 of the manuscript).

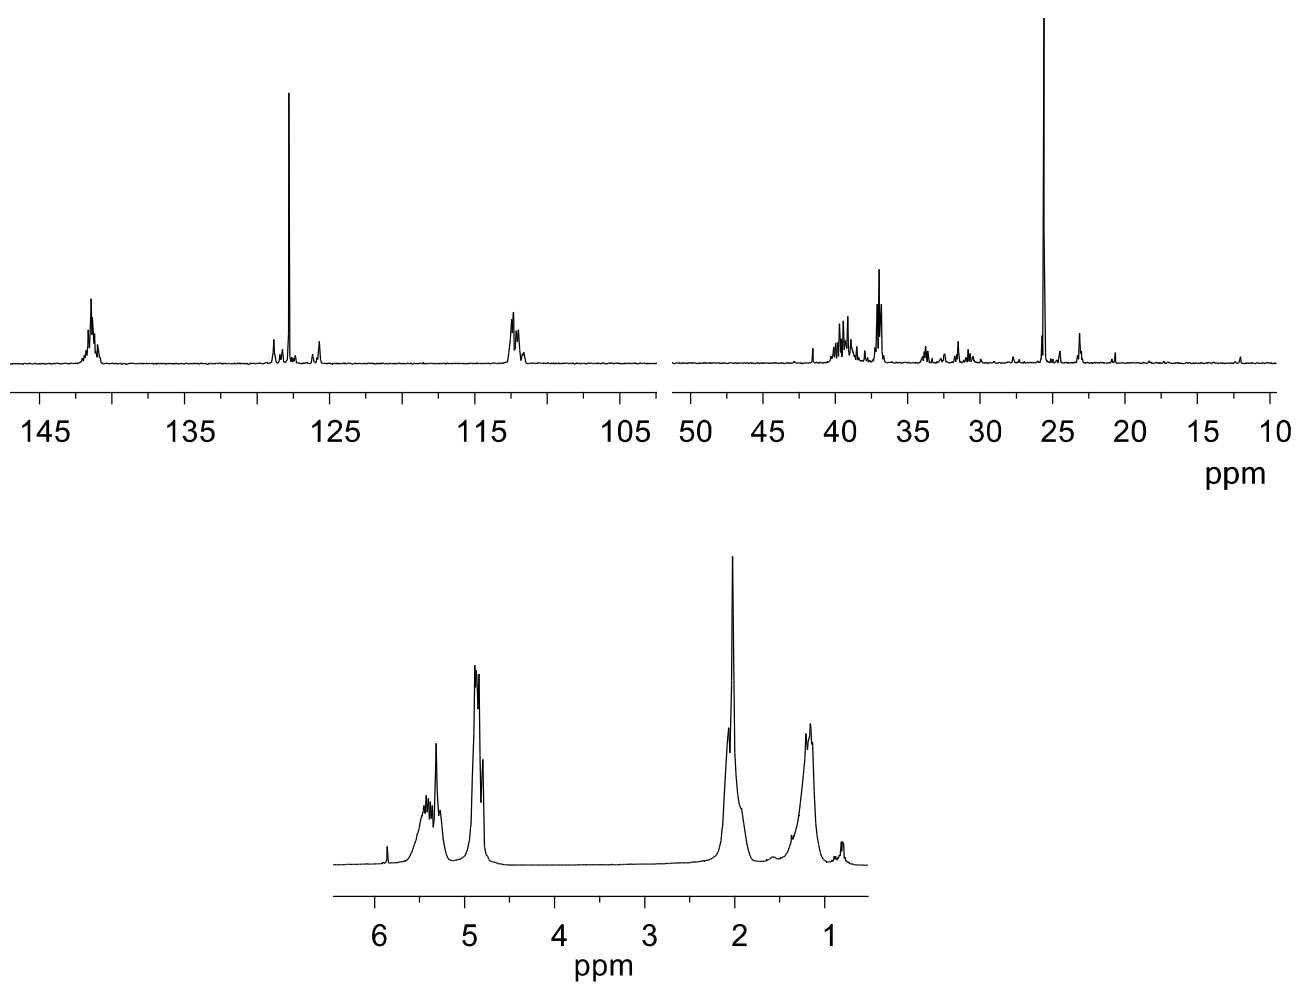

Figure S25.  $^1\text{H}$  (bottom) and  $^{13}\text{C}$  NMR (top) spectra of entry 1 (ref. Table 3 of the manuscript).

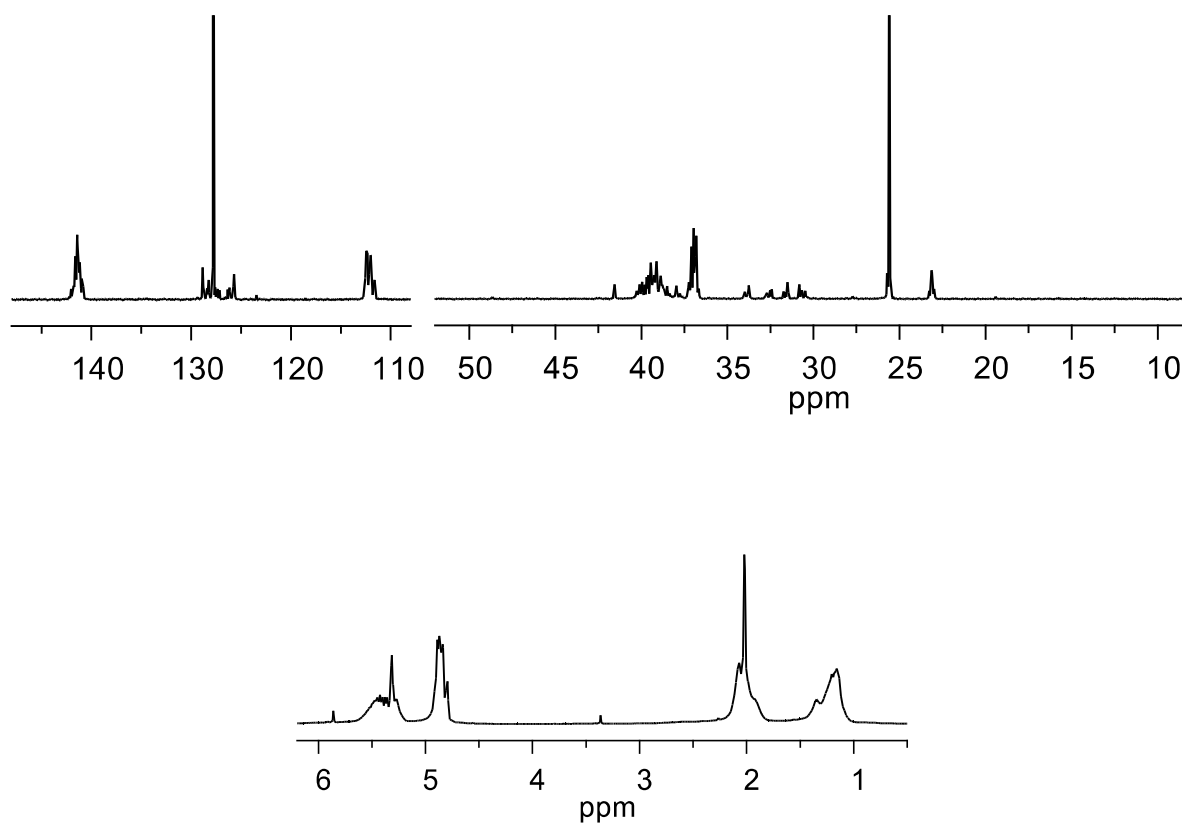

Figure S26.  $^1\text{H}$  (bottom) and  $^{13}\text{C}$  NMR (top) spectra of entry **3** (ref. Table 3 of the manuscript).

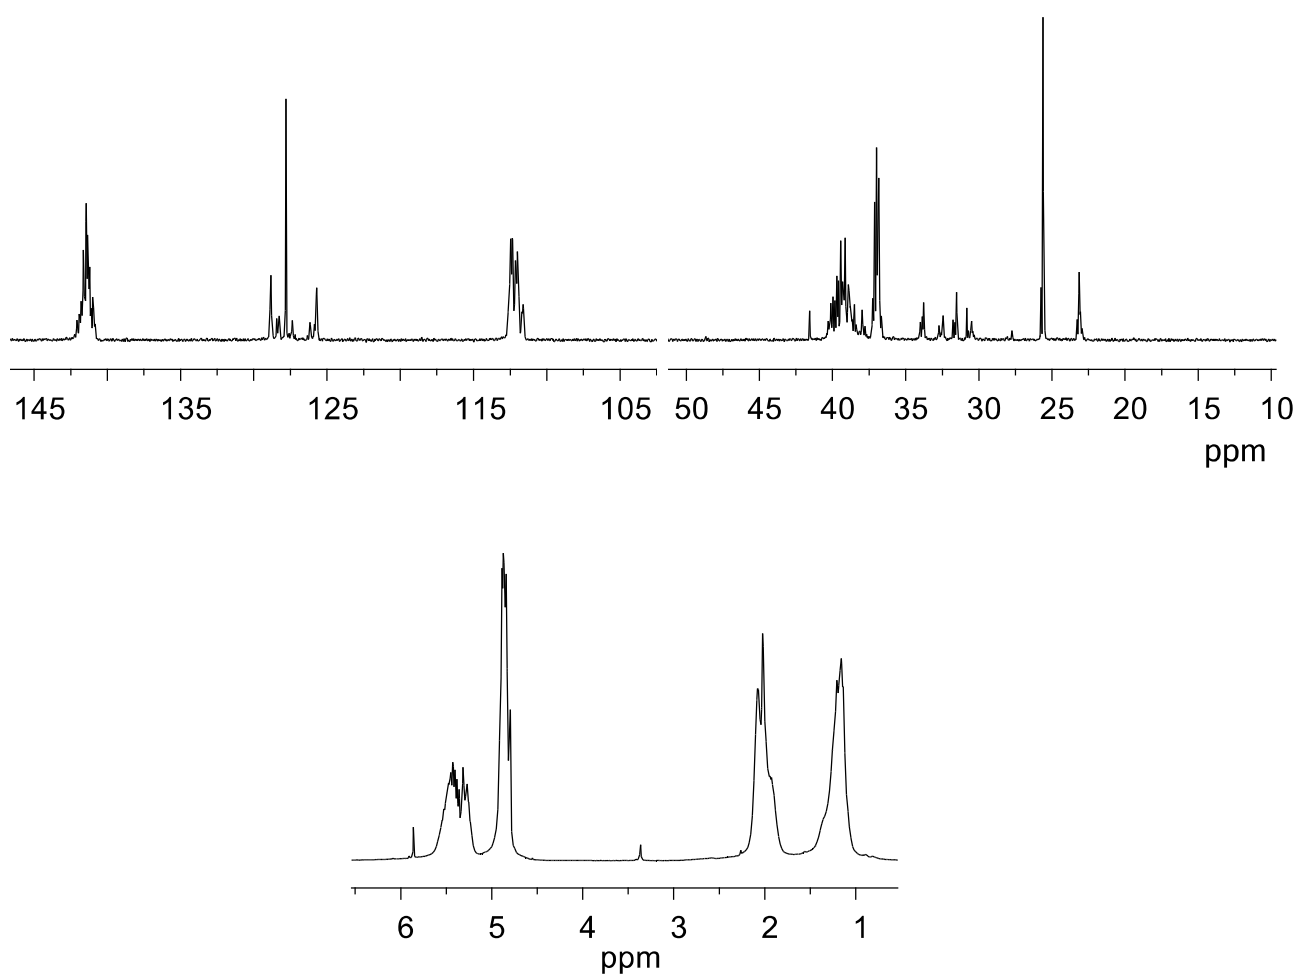

Figure S27.  $^1\text{H}$  (bottom) and  $^{13}\text{C}$  NMR (top) spectra of entry 9 (ref. Table 3 of the manuscript).

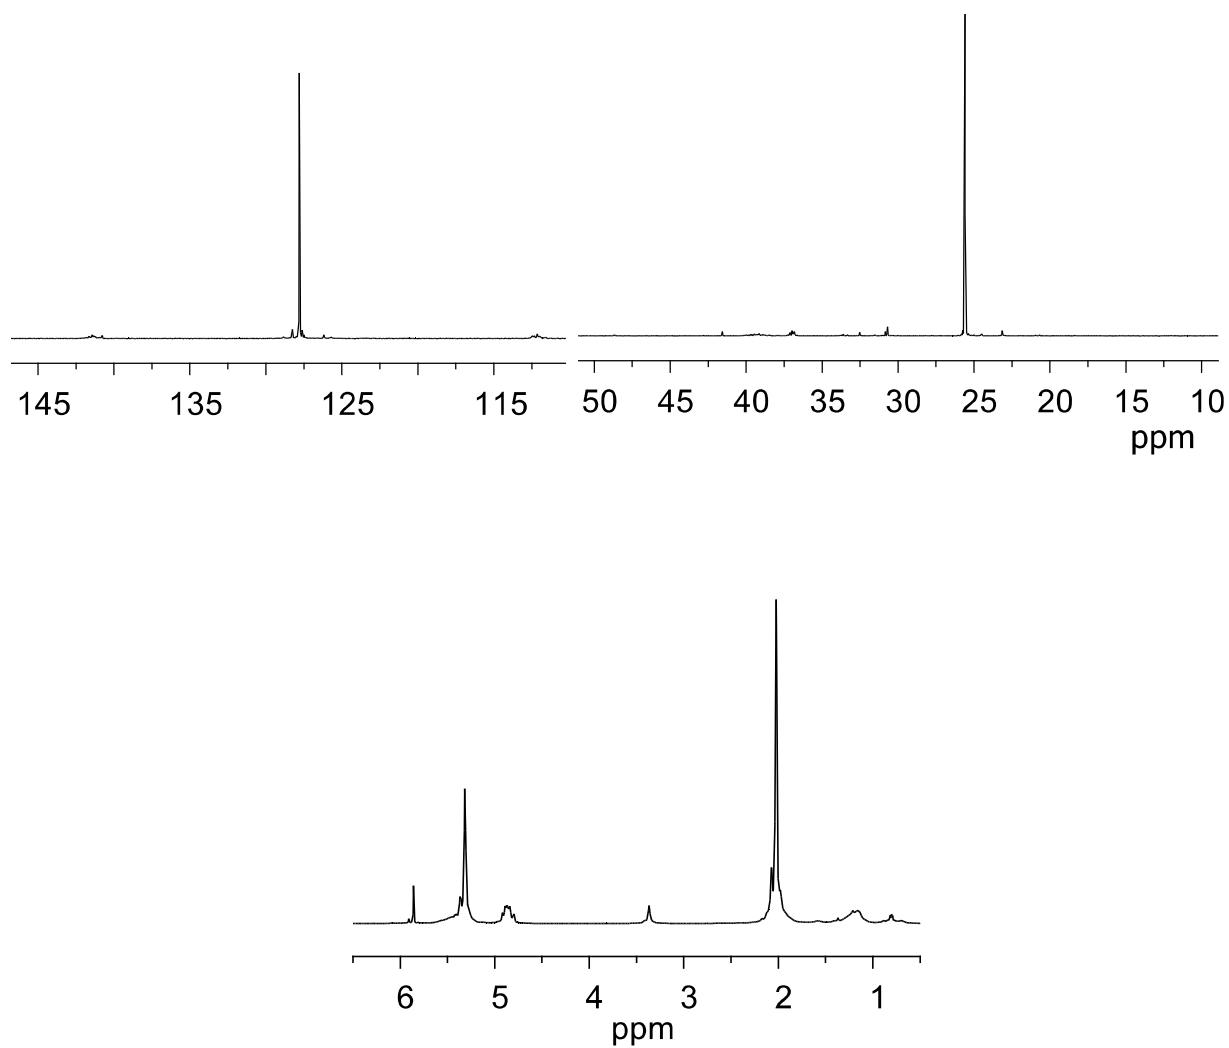

Figure S28.  $^1\text{H}$  (bottom) and  $^{13}\text{C}$  NMR (top) spectra of entry **10** (ref. Table 3 of the manuscript).

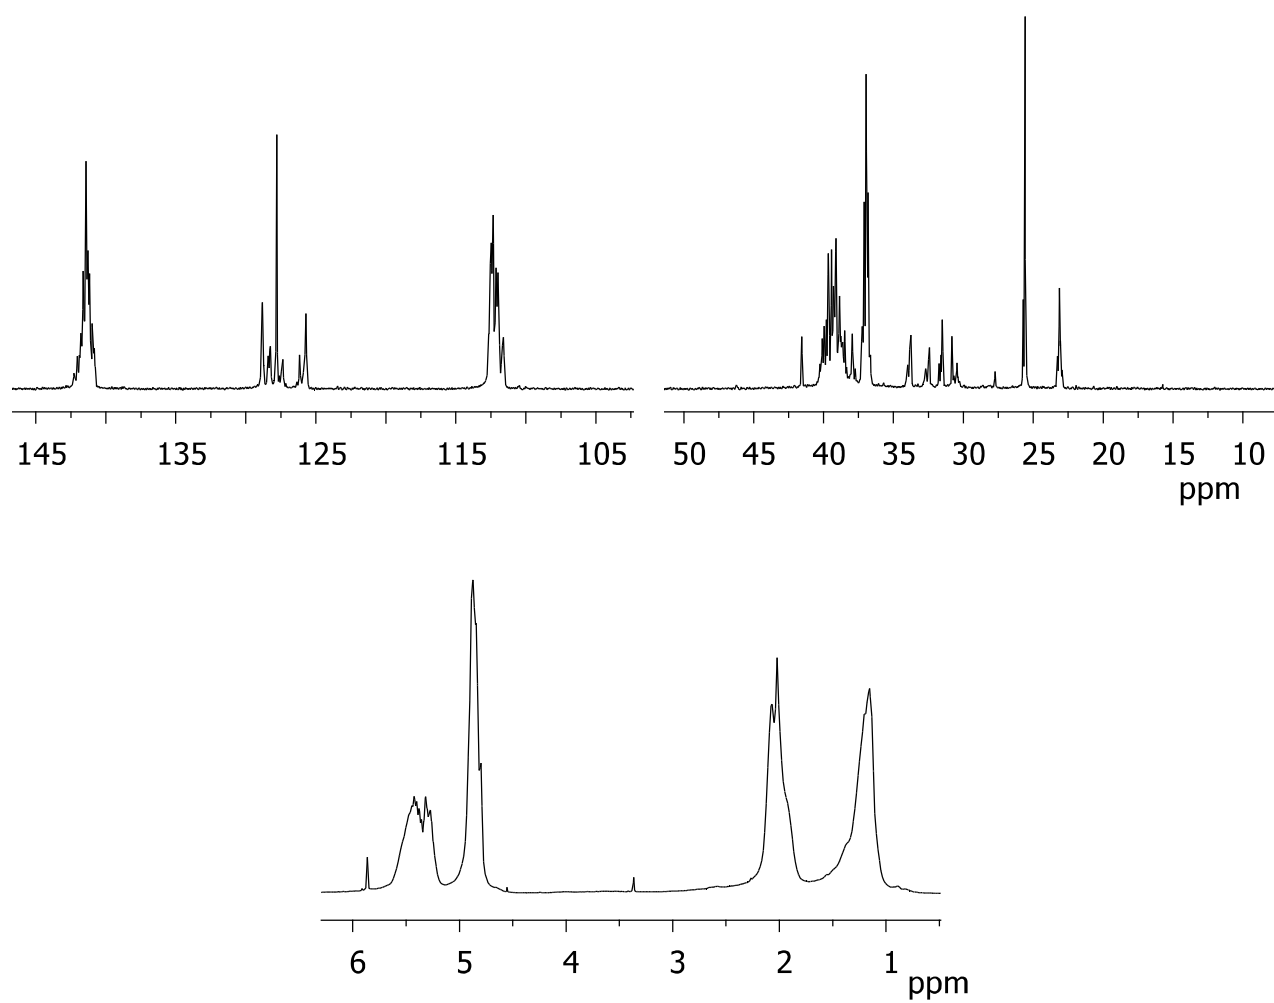

Figure S29.  $^1\text{H}$  (bottom) and  $^{13}\text{C}$  NMR (top) spectra of entry 11 (ref. Table 3 of the manuscript).

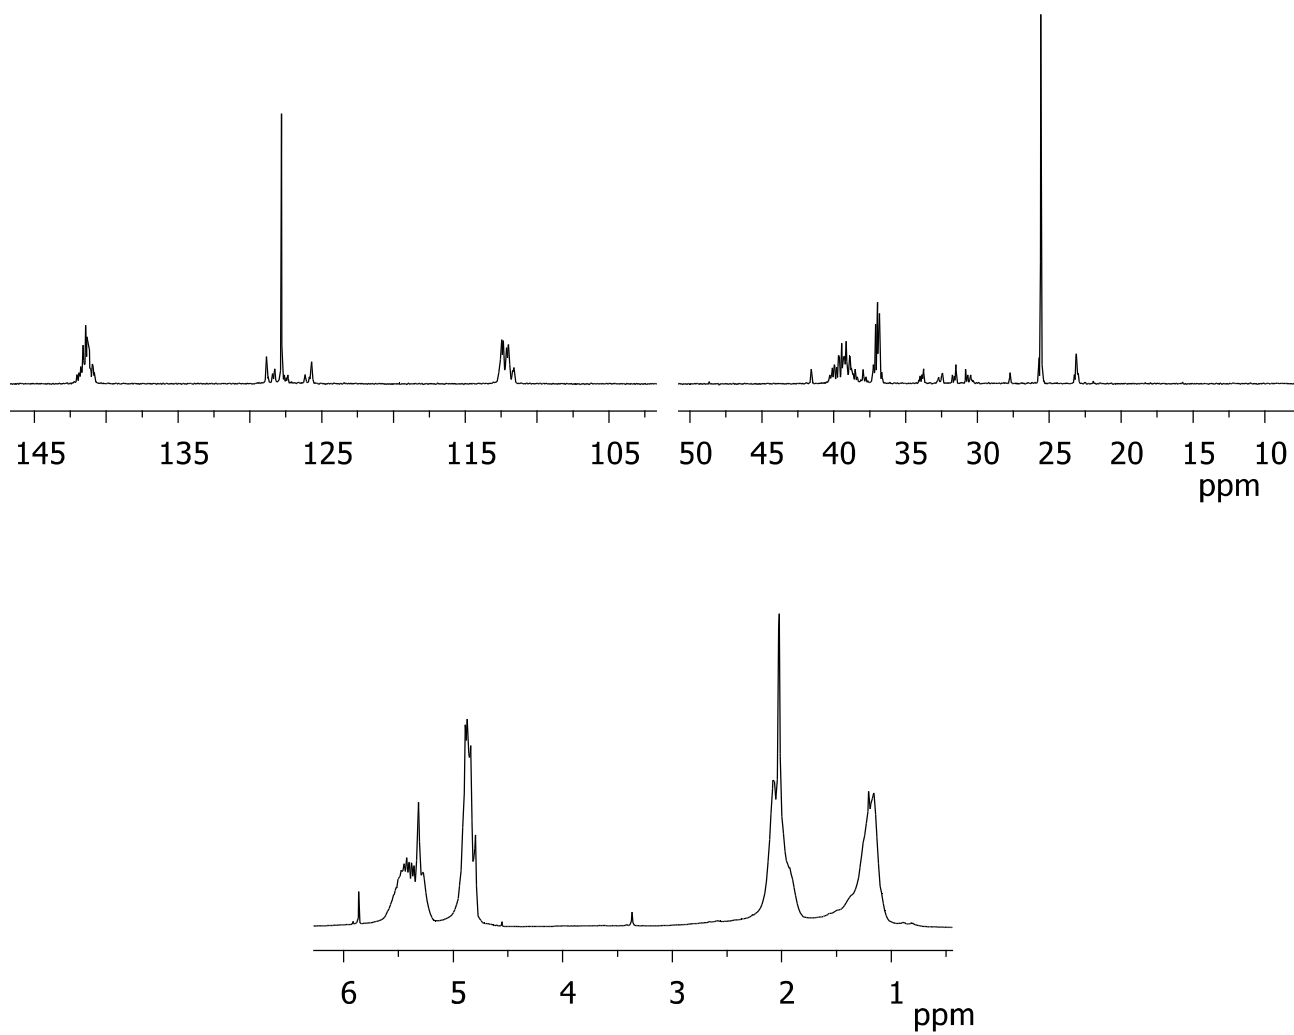

Figure S30.  $^1\text{H}$  (bottom) and  $^{13}\text{C}$  NMR (top) spectra of entry **12** (ref. Table 3 of the manuscript).



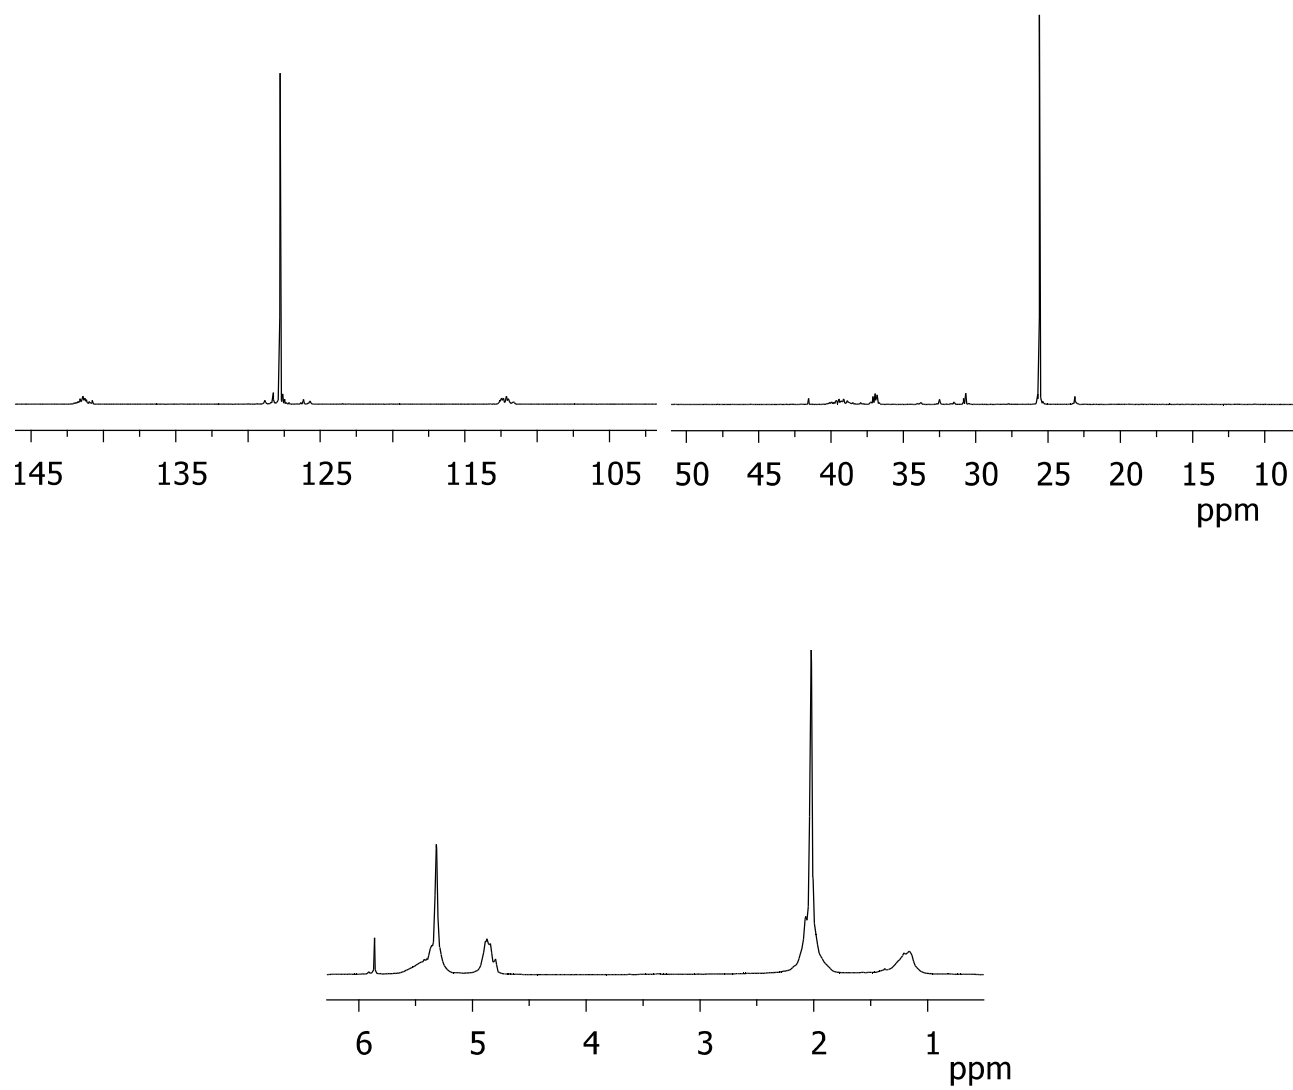

Figure S31.  $^1\text{H}$  (bottom) and  $^{13}\text{C}$  NMR (top) spectra of entry **13** (ref. Table 3 of the manuscript).

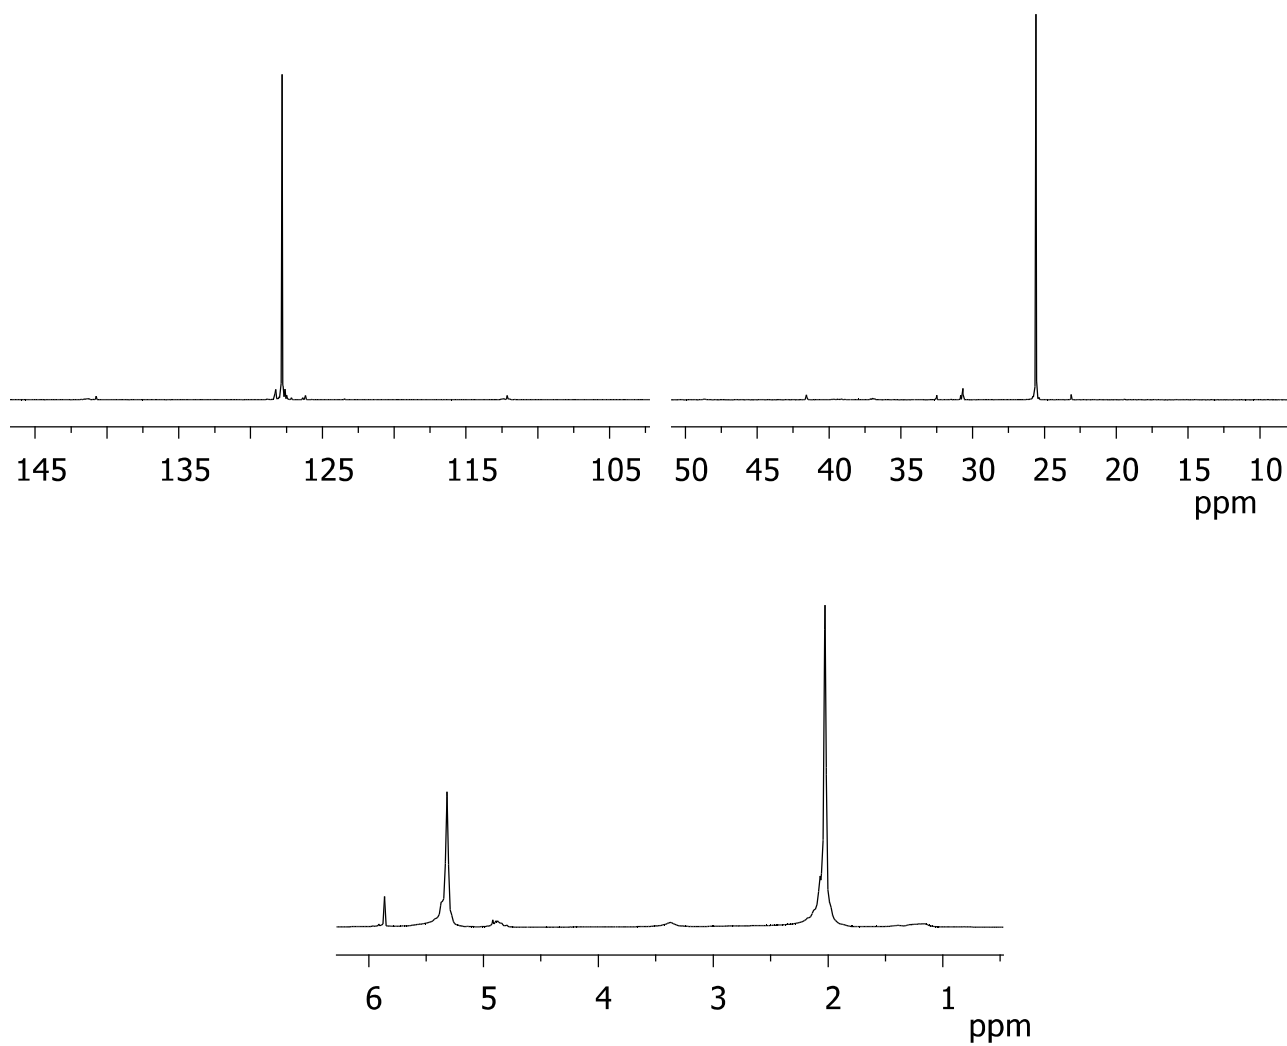

Figure S32.  $^1\text{H}$  (bottom) and  $^{13}\text{C}$  NMR (top) spectra of entry **14** (ref. Table 3 of the manuscript).

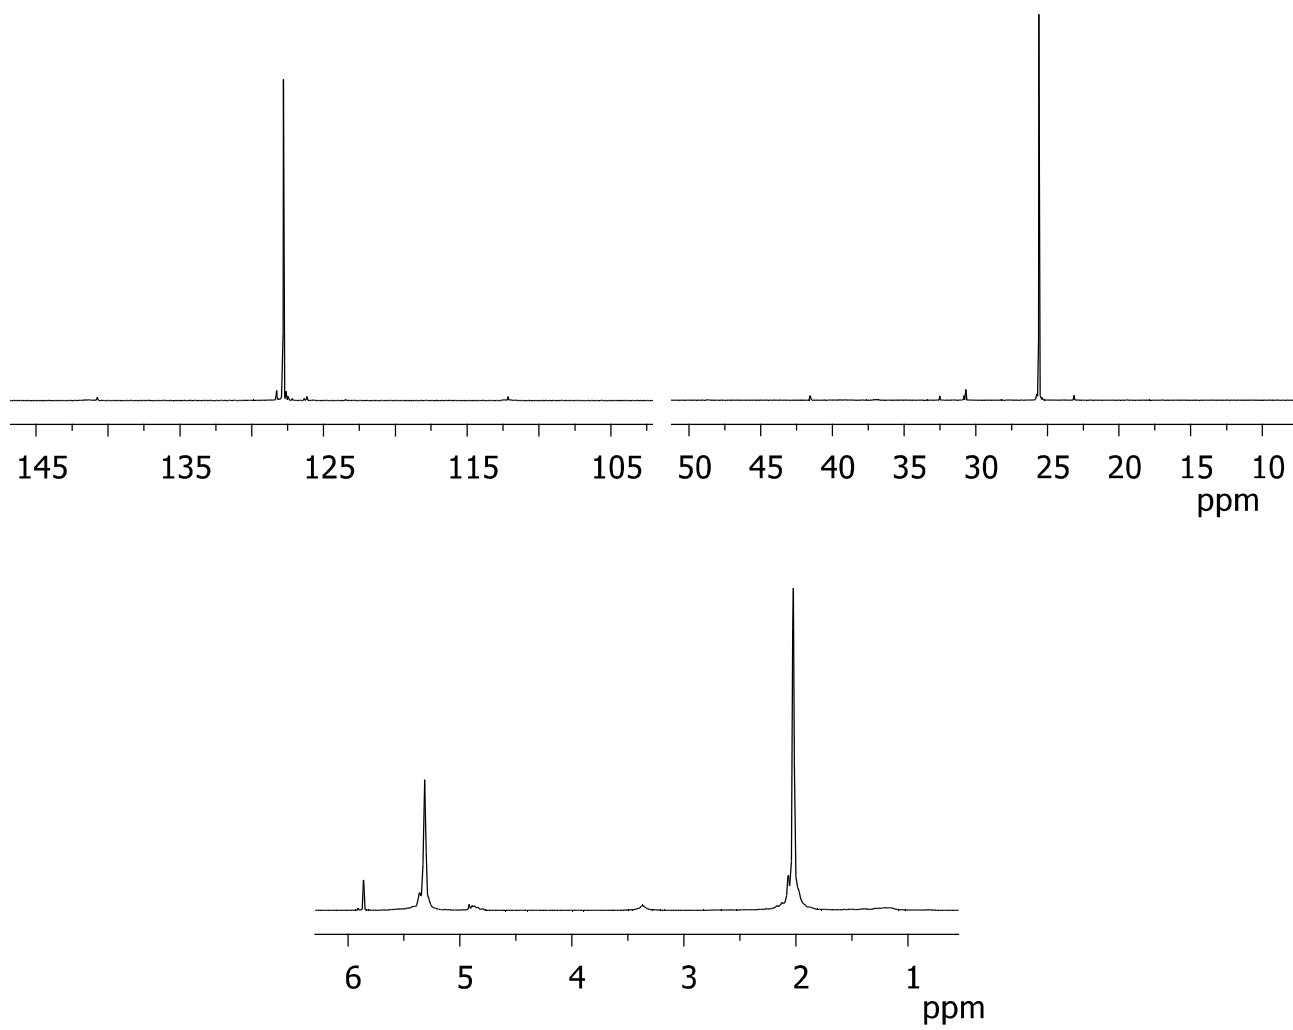

Figure S33.  $^1\text{H}$  (bottom) and  $^{13}\text{C}$  NMR (top) spectra of entry **15** (ref. Table 3 of the manuscript).
